# Supplementary material
Source: Springer Nature journal article supplement (https://www.springermedizin.de/resource/supplementary/12982_2007_53_MOESM18_ESM.pdf/9604370)
Supplement: MOESM18 [file 9604370]

Pashto / پښتو

سرېزه/Editorial

## Open Access for the non-English-speaking world: Overcoming the language barrier.

د نړۍ د هغو ويونکو لپاره اسانه لاسرسی چه انگلیسی نه کاروی

Author: Isaac Chun-Hai FUNG / لیکوال

Abstract / لنډيز

دا سر مقاله د ازادې لاس رسی د یون سره سره په علمی پوهاوی کی د ژبنيو خندونو ستونزی را برسیره وی.

په انگلیسی ژبه کی د ژورنالونو د ژبنيو خندونو د له منحه ورلو لپاره حلور وړاندیزونه شویدی.

1- د لیکوالانو پواسطه په نورو ژبو کی د لنډیزونو برابرول

2- Wiki آزاده ژباړه

3- د لیکوالانو او ژباړونکو بین المللی بورډ

4- په بله ژبه کی د ژورنال ژباړه

په اپیدمیولوژی کی د نویو موضوعاتو را پیدا کیدل ( Emerging themes in Epidemiology ) د بیرنی کرنی په موخه د لیکوالانو په مت په اضافی ډول د لنډیزونو یا بشپړ متن ژباړه د منلو وړ بولی.
